# Supplementary material
Source: Springer Nature journal article supplement (https://www.springermedizin.de/resource/supplementary/13075_2004_1352_MOESM3_ESM.pdf/9689582)

**(a)**

MMP13

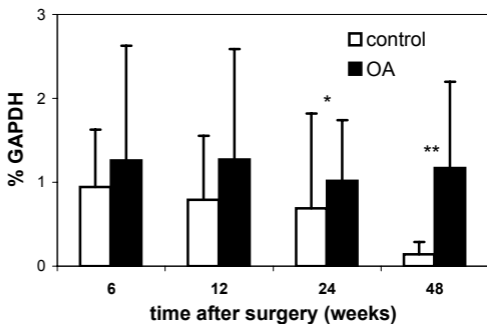**(b)**

TenascinC

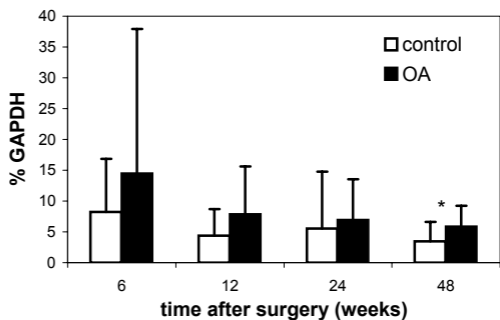**(c)**

Aggrecan

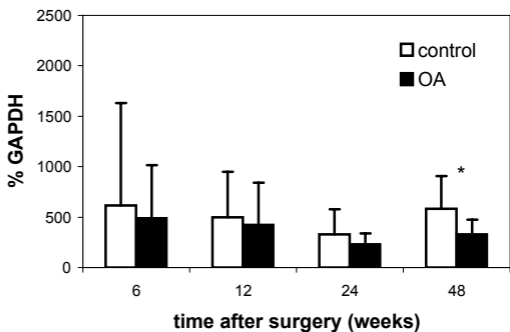

Supplement: MOESM3 [file 9689582]
